# Supplementary material for: Sintered Glass Monoliths as New Supports for Affinity Columns
Source: Preprints.org preprint supplement (doi:10.20944/preprints202103.0298.v1), 2021-03-11
Supplement: Supplementary file 1 [file supplementary]

| REVISION HISTORY |             |      |          |
|------------------|-------------|------|----------|
| REV              | DESCRIPTION | DATE | APPROVED |
|                  |             |      |          |

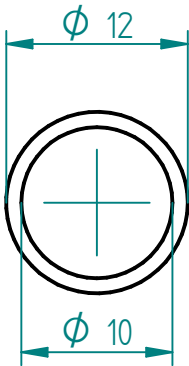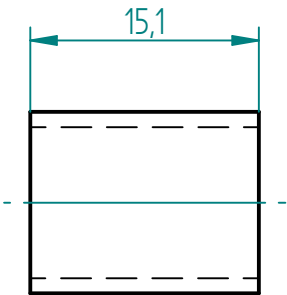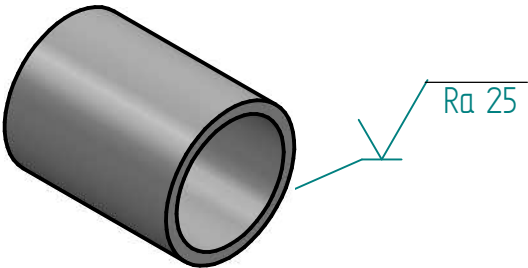

|                                                                                                                                                 |         |          |                        |                                |           |
|-------------------------------------------------------------------------------------------------------------------------------------------------|---------|----------|------------------------|--------------------------------|-----------|
|                                                                                                                                                 | NAME    | DATE     | Titanium tube          |                                |           |
| DRAWN                                                                                                                                           | broeder | 07/17/20 |                        |                                |           |
| CHECKED                                                                                                                                         |         |          | TITLE<br>Column holder |                                |           |
| ENG APPR                                                                                                                                        |         |          |                        |                                |           |
| MGR APPR                                                                                                                                        |         |          |                        |                                |           |
| <br>Bundesanstalt für<br>Materialforschung<br>und -prüfung |         |          | SIZE<br>A4             | DWG NO<br>Titanium pipe 12 x 1 | M1:1      |
|                                                                                                                                                 |         |          |                        |                                |           |
|                                                                                                                                                 |         |          | SCALE:                 | WEIGHT:                        | SolidEdge |
