# Supplementary material for: Sintered Glass Monoliths as New Supports for Affinity Columns
Source: Preprints.org preprint supplement (doi:10.20944/preprints202103.0298.v1), 2021-03-11
Supplement: Supplementary file 2 [file supplementary]

| REVISION HISTORY |             |      |          |
|------------------|-------------|------|----------|
| REV              | DESCRIPTION | DATE | APPROVED |
|                  |             |      |          |

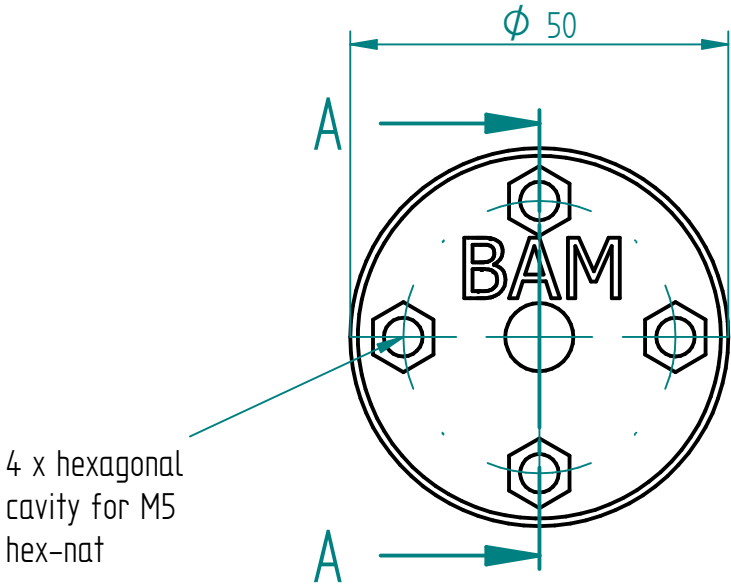

4 x hexagonal  
cavity for M5  
hex-nut

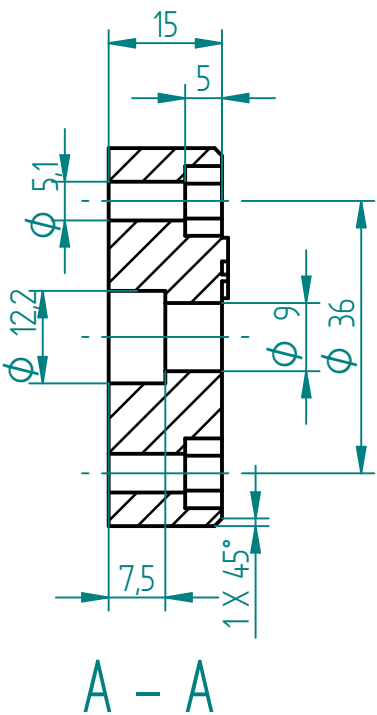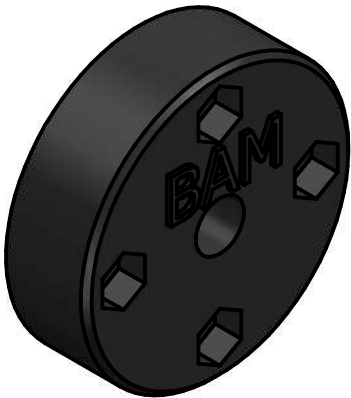

|                                                                                                                                                                          |         |          |                            |                  |           |
|--------------------------------------------------------------------------------------------------------------------------------------------------------------------------|---------|----------|----------------------------|------------------|-----------|
|                                                                                                                                                                          | NAME    | DATE     | Plate 1                    |                  |           |
| DRAWN                                                                                                                                                                    | broeder | 07/22/20 |                            |                  |           |
| CHECKED                                                                                                                                                                  |         |          | TITLE<br><br>Column holder |                  |           |
| ENG APPR                                                                                                                                                                 |         |          |                            |                  |           |
| MGR APPR                                                                                                                                                                 |         |          |                            |                  |           |
| <div> <b>BAM</b><br/>Bundesanstalt für<br/>Materialforschung<br/>und -prüfung</div> |         |          | SIZE<br>A3                 | ABS – 3D printed | M1:1      |
|                                                                                                                                                                          |         |          |                            |                  |           |
|                                                                                                                                                                          |         |          |                            |                  |           |
|                                                                                                                                                                          |         |          | SCALE:                     | WEIGHT:          | SolidEdge |
