# Supplementary material for: Sintered Glass Monoliths as New Supports for Affinity Columns
Source: Preprints.org preprint supplement (doi:10.20944/preprints202103.0298.v1), 2021-03-11
Supplement: Supplementary file 3 [file supplementary]

| REVISION HISTORY |             |      |          |
|------------------|-------------|------|----------|
| REV              | DESCRIPTION | DATE | APPROVED |
|                  |             |      |          |

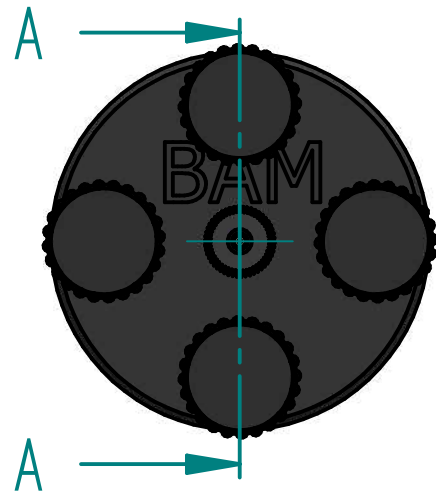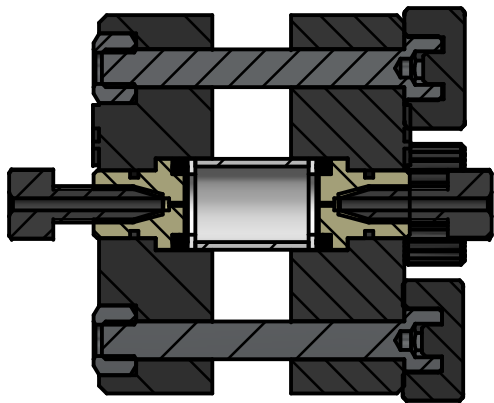

A – A

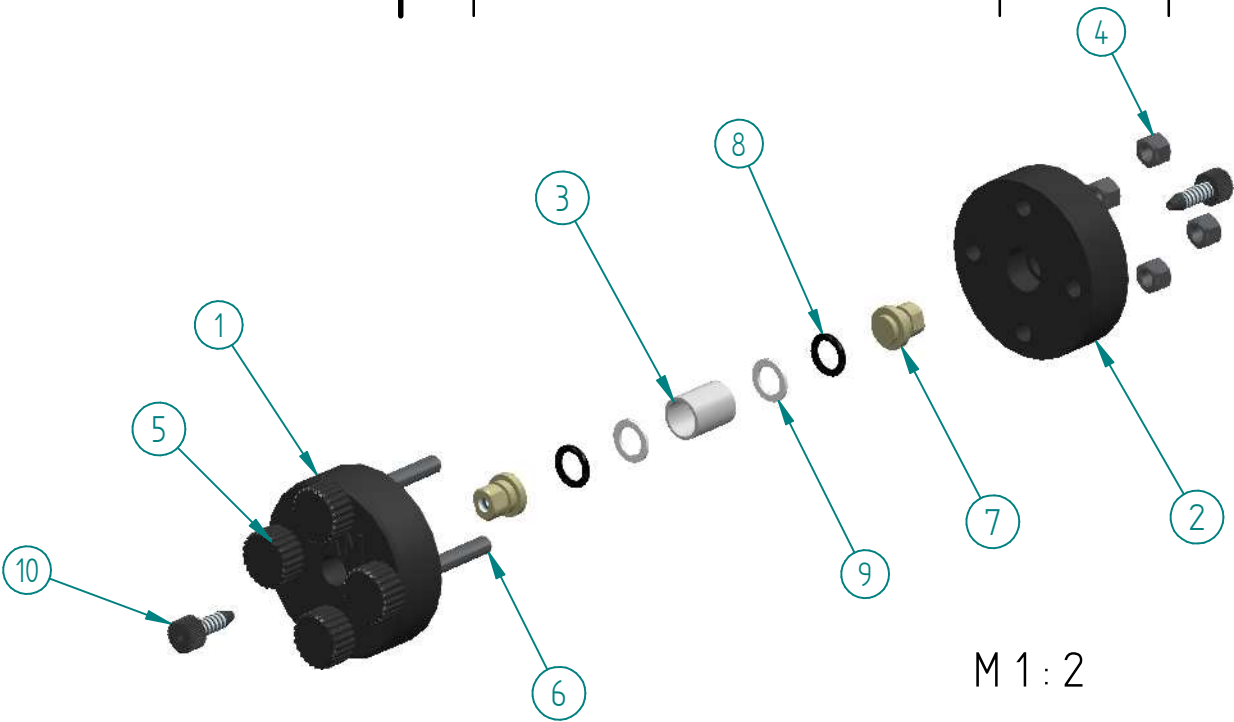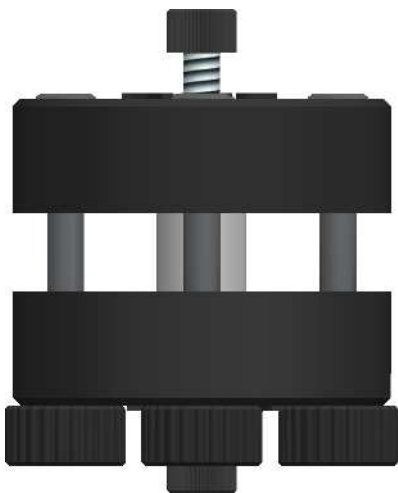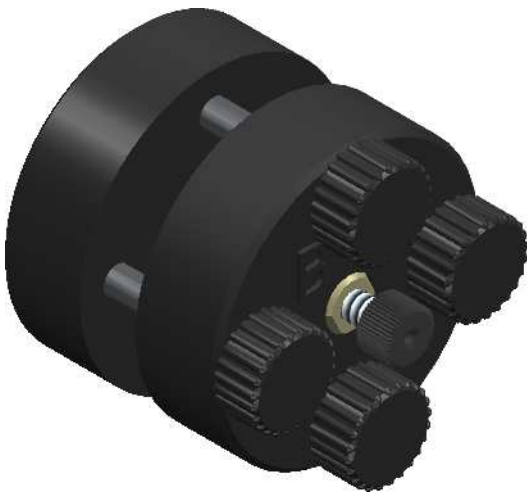

| Number | Name                      | Material                    | Qty |
|--------|---------------------------|-----------------------------|-----|
| 1      | Plate 1                   | ABS                         | 1   |
| 2      | Plate 2                   | ABS                         | 1   |
| 3*     | Titanium tube             | Titanium                    | 1   |
| 4      | ISO 4034 - M5 DIN EN      | V2A stainless steel         | 4   |
| 5      | Knurled Knob M5           | ABS                         | 4   |
| 6      | ISO 4762- M5 x 40 DIN 912 | V2A stainless steel         | 4   |
| 7      | Fluid connection          | PEEK                        | 2   |
| 8      | O-Ring 2/12               | (NBR) 70 DURO BLACK         | 2   |
| 9      | Silicone                  | Silicone Shore 60 Sh-A 1 mm | 2   |
| 10     | Fitting_unf 10-32 Ferule  | PEEK                        | 2   |

|                                                                                                                                                 |         |          |                        |         |           |
|-------------------------------------------------------------------------------------------------------------------------------------------------|---------|----------|------------------------|---------|-----------|
|                                                                                                                                                 | NAME    | DATE     | Column holder          |         |           |
| DRAWN                                                                                                                                           | broeder | 07/22/20 |                        |         |           |
| CHECKED                                                                                                                                         |         |          |                        |         |           |
| ENG APPR                                                                                                                                        |         |          | TITLE<br>Column holder |         |           |
| MGR APPR                                                                                                                                        |         |          |                        |         |           |
| <br>Bundesanstalt für<br>Materialforschung<br>und -prüfung |         |          | SIZE<br>A3             | DWG NO  | M1:1      |
|                                                                                                                                                 |         |          |                        |         |           |
|                                                                                                                                                 |         |          |                        |         |           |
|                                                                                                                                                 |         |          | SCALE:                 | WEIGHT: | SolidEdge |
