# Supplementary material for: Sintered Glass Monoliths as New Supports for Affinity Columns
Source: Preprints.org preprint supplement (doi:10.20944/preprints202103.0298.v1), 2021-03-11
Supplement: Supplementary file 6 [file supplementary]

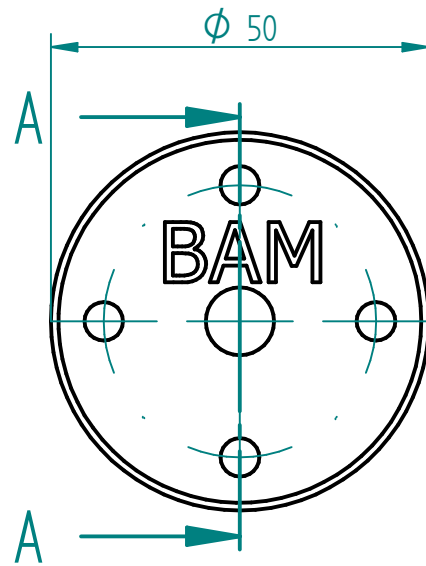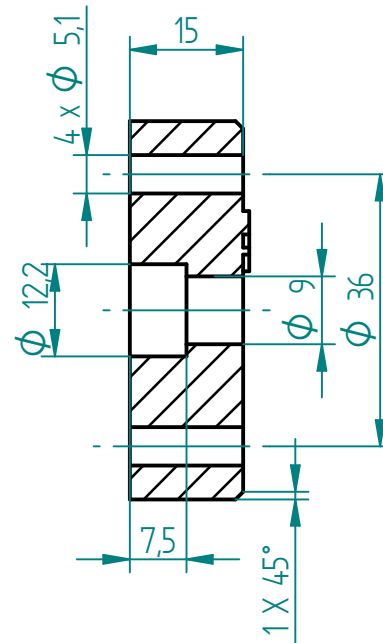

A - A

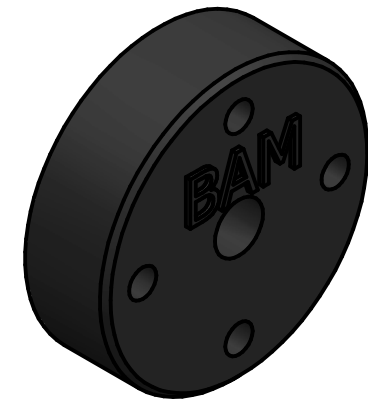

SOLID EDGE ACADEMIC COPY

| REVISION HISTORY |             |      |          |
|------------------|-------------|------|----------|
| REV              | DESCRIPTION | DATE | APPROVED |
|                  |             |      |          |

|                                                                                                                                                 |         |          |               |                |
|-------------------------------------------------------------------------------------------------------------------------------------------------|---------|----------|---------------|----------------|
|                                                                                                                                                 | NAME    | DATE     | Plate 2       |                |
| DRAWN                                                                                                                                           | broeder | 07/22/20 |               |                |
| CHECKED                                                                                                                                         |         |          | TITLE         |                |
| ENG APPR                                                                                                                                        |         |          |               |                |
| MGR APPR                                                                                                                                        |         |          | Column holder |                |
| <br>Bundesanstalt für<br>Materialforschung<br>und -prüfung |         |          | SIZE          | DWG NO         |
|                                                                                                                                                 |         |          | A4            | ABS 3D printed |
|                                                                                                                                                 |         |          | M1:1          |                |
| SCALE:                                                                                                                                          |         | WEIGHT:  | SolidEdge     |                |
