# Supplementary material for: Sintered Glass Monoliths as New Supports for Affinity Columns
Source: Preprints.org preprint supplement (doi:10.20944/preprints202103.0298.v1), 2021-03-11
Supplement: Supplementary file 7 [file supplementary]

| REVISION HISTORY |             |      |          |
|------------------|-------------|------|----------|
| REV              | DESCRIPTION | DATE | APPROVED |
|                  |             |      |          |

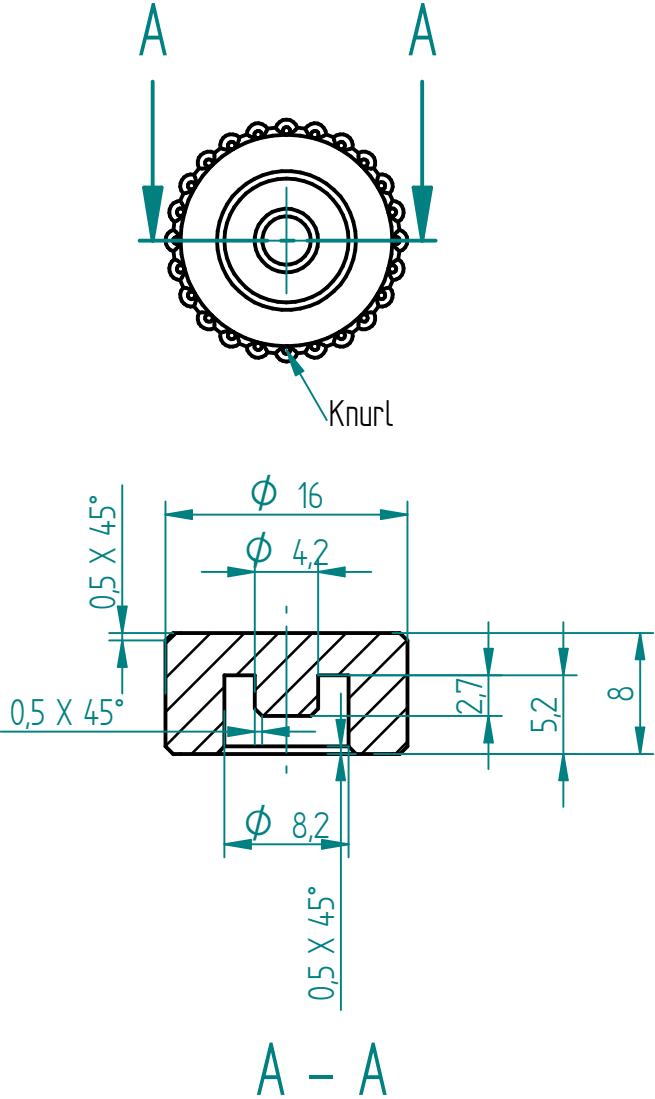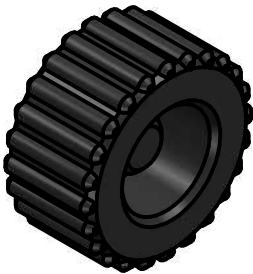

|                                                                                                                                                                                       |         |          |                     |                |           |
|---------------------------------------------------------------------------------------------------------------------------------------------------------------------------------------|---------|----------|---------------------|----------------|-----------|
|                                                                                                                                                                                       | NAME    | DATE     | Knurled Knob for M5 |                |           |
| DRAWN                                                                                                                                                                                 | broeder | 07/17/20 |                     |                |           |
| CHECKED                                                                                                                                                                               |         |          | TITLE               |                |           |
| ENG APPR                                                                                                                                                                              |         |          |                     |                |           |
| MGR APPR                                                                                                                                                                              |         |          | Column holder       |                |           |
|  <div> <div>BAM</div> <div>Bundesanstalt für<br/>Materialforschung<br/>und -prüfung</div> </div> |         |          | SIZE<br>A4          | ABS 3D printed | M2:1      |
|                                                                                                                                                                                       |         |          | SCALE:              | WEIGHT:        | SolidEdge |
